# Supplementary material
Source: PubMed Central journal article supplement (PMC5971230)

A

#1531

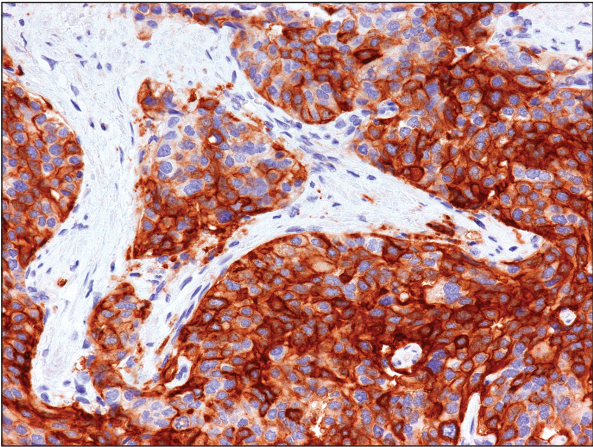

Microsatellite stable

B

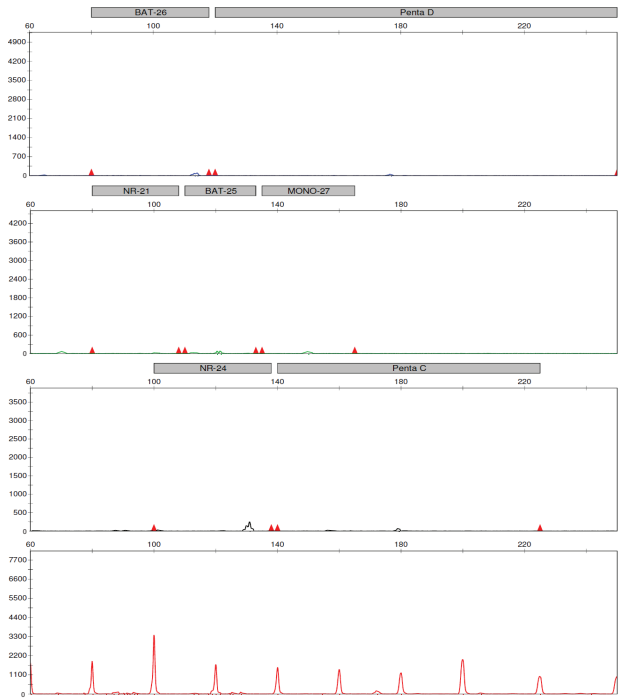

Normal  
(180 seconds injection)

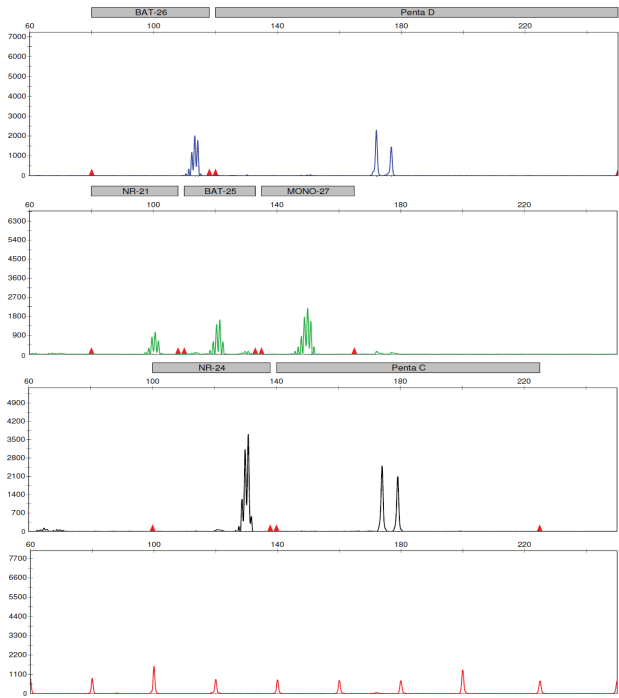

Tumor  
(60 seconds injection)

Supplement: mmc1.pdf [file mmc1.pdf]

**A** #15749

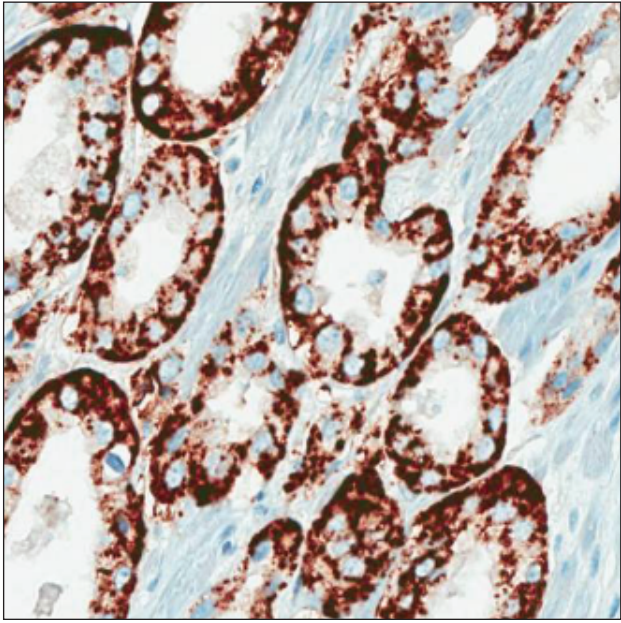

**B** Microsatellite stable

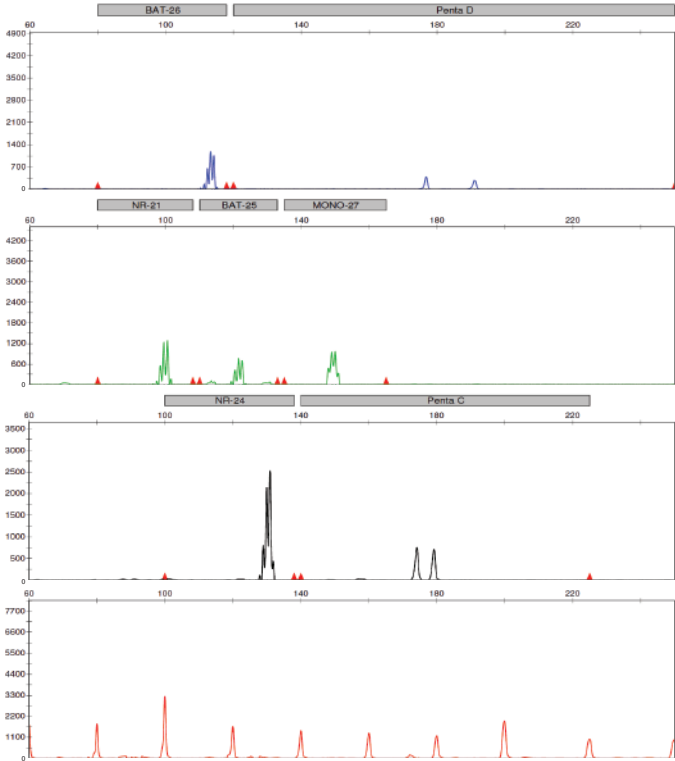

Normal  
(180 seconds injection)

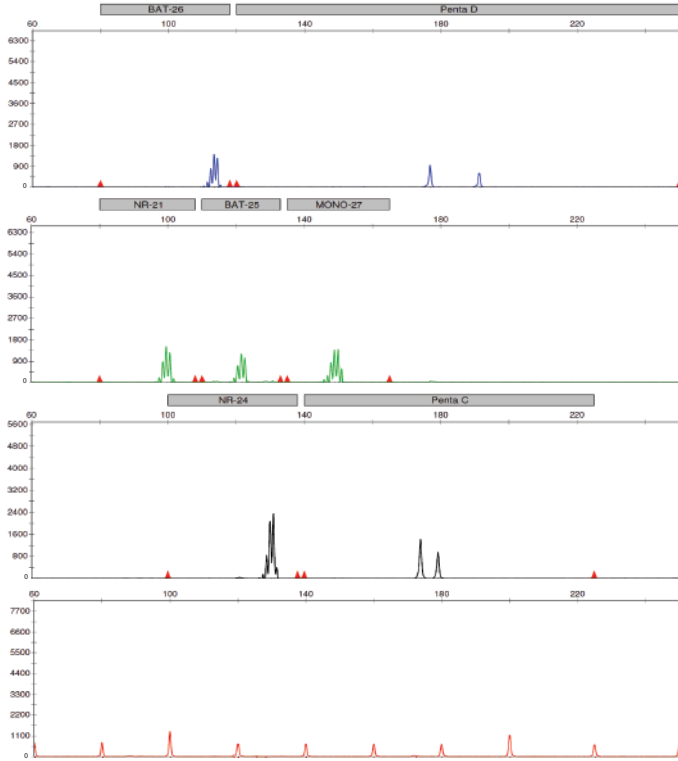

Tumor  
(60 seconds injection)

Supplement: mmc2.pdf [file mmc2.pdf]

Small cell carcinoma

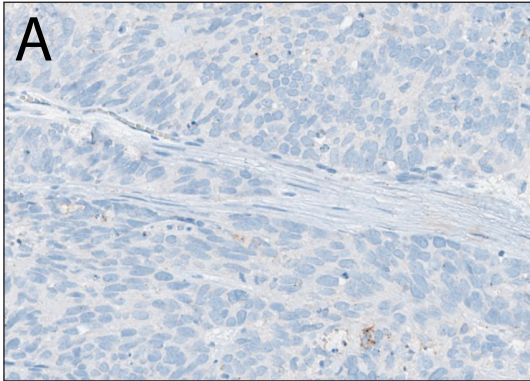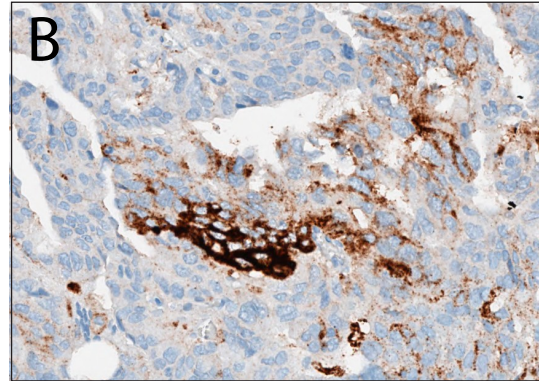

Prostatic duct adenocarcinoma

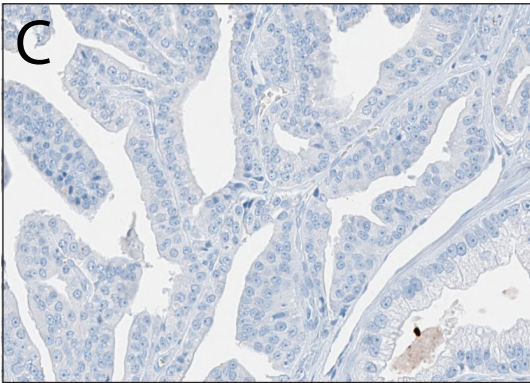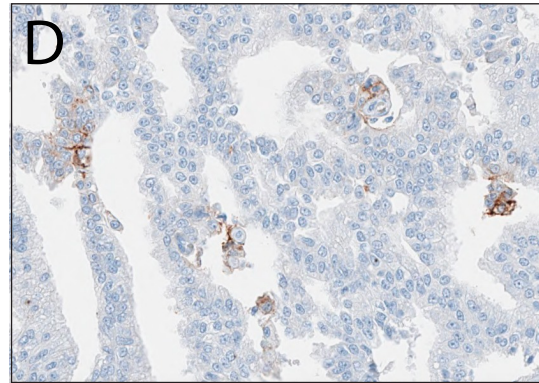

Supplement: mmc3.pdf [file mmc3.pdf]

Supplementary Figure 4. Haffner MC et al.

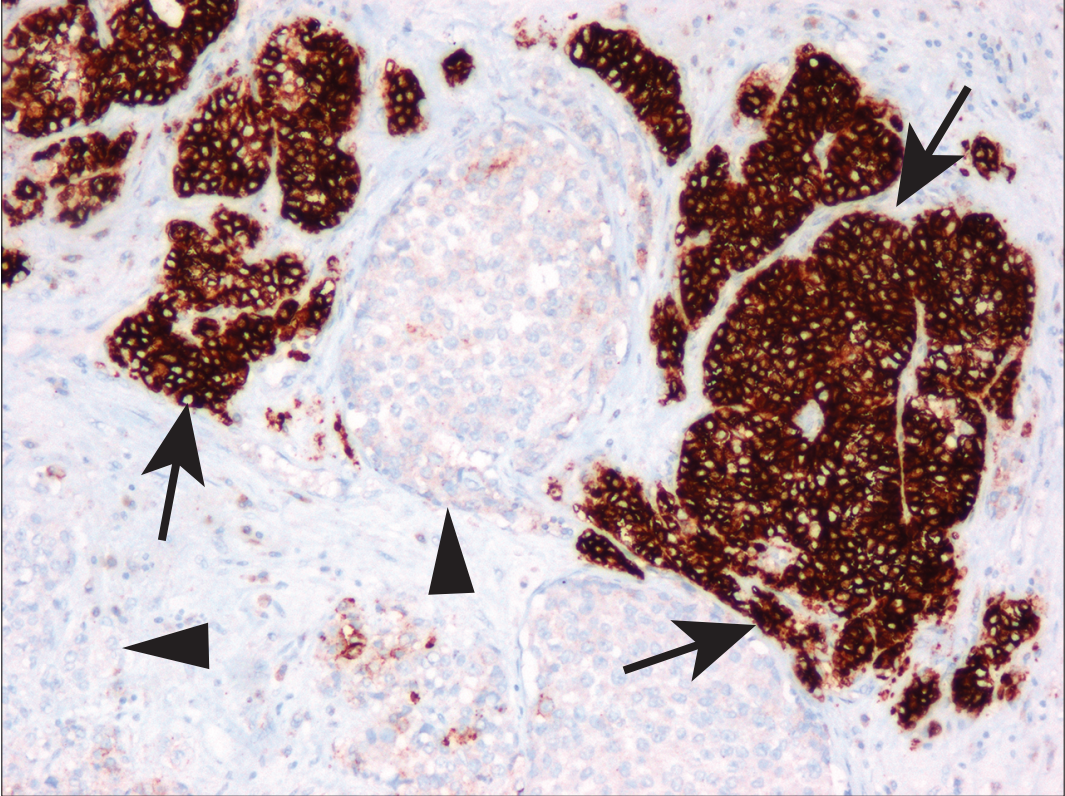

Supplement: mmc4.pdf [file mmc4.pdf]

Supplementary Figure 5. Haffner MC et al.

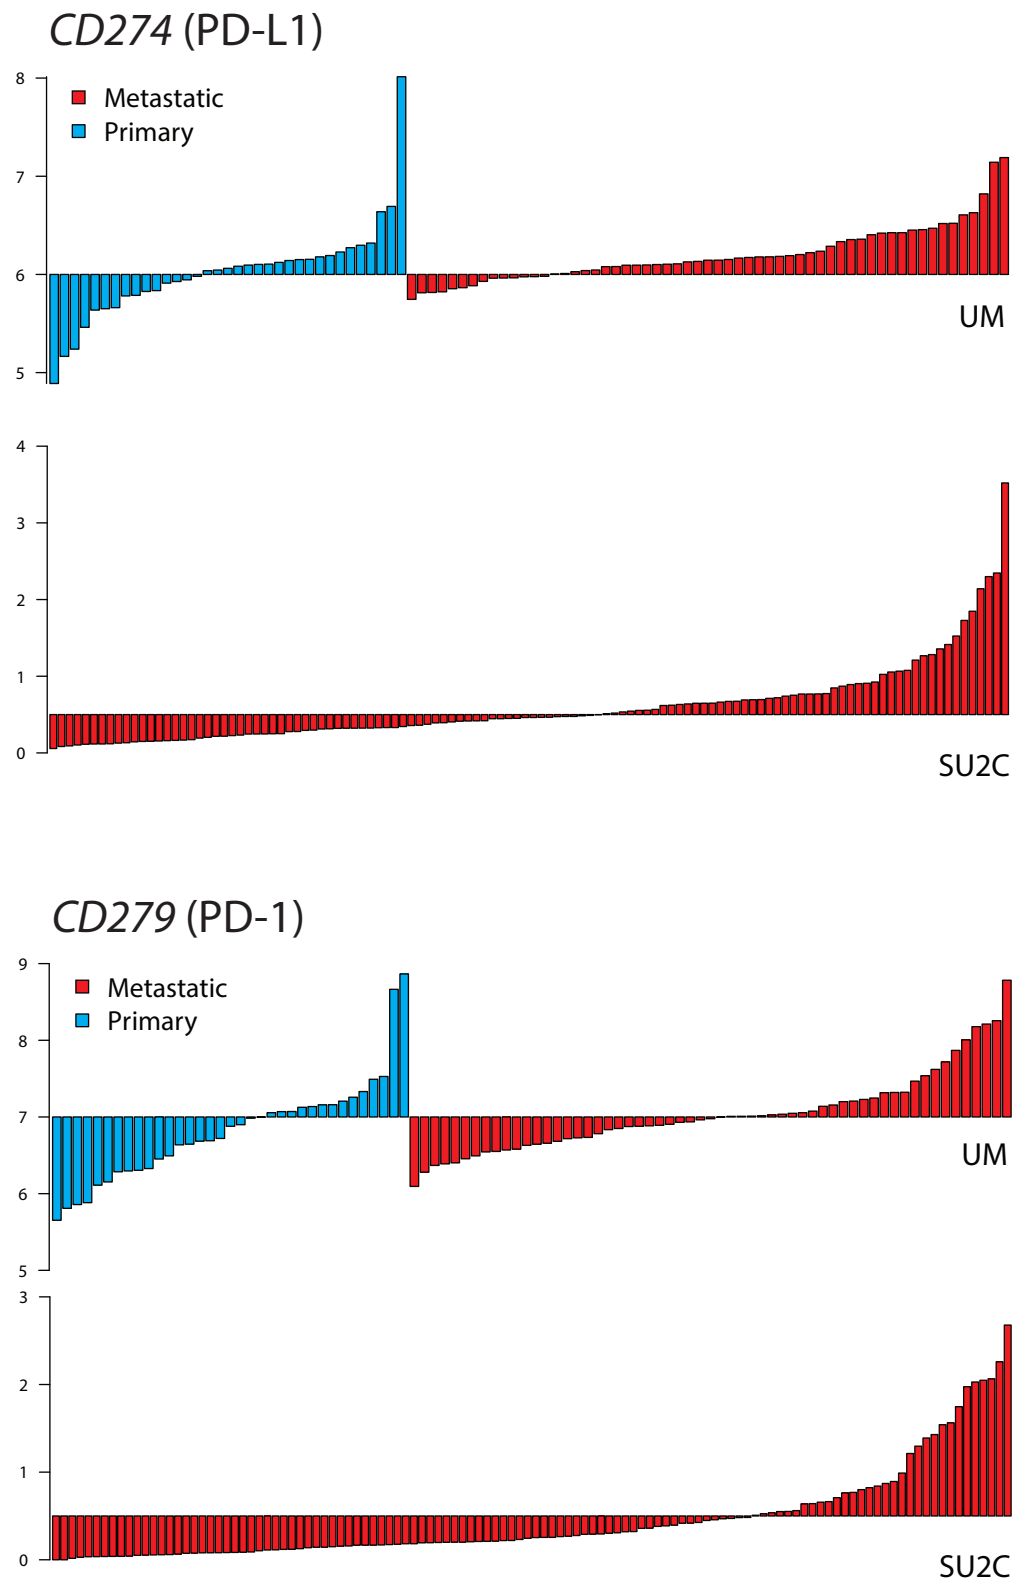

Supplement: mmc5.pdf [file mmc5.pdf]
